# Supplementary material
Source: PubMed Central journal article supplement (PMC8670840)
Supplement: jci-131-151969-s078.pdf [file jci-131-151969-s078.pdf]

## **Cross-protective immunity following coronavirus vaccination and coronavirus infection**

Tanushree Dangi<sup>#1</sup>, Nicole Palacio<sup>#1</sup>, Sarah Sanchez<sup>1</sup>, Mincheol Park<sup>1</sup>, Jacob Class<sup>2</sup>, Lavanya Visvabharathy<sup>3</sup>, Thomas Ciucci<sup>4,5</sup>, Igor J. Koralnik<sup>3</sup>, Justin Richner<sup>\*2</sup>, Pablo Penaloza-MacMaster<sup>\*1</sup>

<sup>1</sup>Department of Microbiology-Immunology, Feinberg School of Medicine, Northwestern University, Chicago, IL 60611, USA. <sup>2</sup>Department of Microbiology & Immunology, University of Illinois at Chicago, Chicago, IL 60612, USA. <sup>3</sup>Ken and Ruth Davee Department of Neurology, Feinberg School of Medicine, Northwestern University, Chicago, IL 60611, USA. <sup>4</sup>David H. Smith Center for Vaccine Biology and Immunology, University of Rochester, Rochester, NY 14642, USA. <sup>5</sup>Department of Microbiology and Immunology, Center for Vaccine Biology and Immunology, University of Rochester, Rochester, NY 14642, USA.

<sup>#</sup>These authors contributed equally

### **\*Correspondence:**

Justin Richner ([richner@uic.edu](mailto:richner@uic.edu))

835 S Wolcott

Room E703 MC790

Chicago IL 60612-7342

Office: 312-996-4834

Pablo Penaloza-MacMaster ([ppm@northwestern.edu](mailto:ppm@northwestern.edu))

303 E. Chicago Ave.

Tarry 6-733, Chicago, IL 60611

Lab: 312.503.0357

Office: 312.503.5240

## Supplemental Figure Legends:

**Supplemental Figure 1. Serology screening in humans prior to vaccination and unrelated cross-reactive antibodies post vaccination.** SARS-CoV-2 nucleocapsid specific antibody titers prior to vaccination in **(A)** unexposed, **(B)** unexposed immunosuppressed, and **(C)** exposed participants. **(D)** Summary of nucleocapsid specific antibody responses. Influenza virus H1N1 HA specific antibodies pre (V0) and post (V1) vaccination in **(E)** unexposed, **(F)** unexposed immunosuppressed, and **(G)** exposed participants. **(H)** Summary of Influenza virus H1N1 HA specific antibodies for V0 and V1. \*\*,  $P < 0.01$ , \*\*\*\*  $P < 0.0001$ , and ns=not significant by one way ANOVA with multiple comparisons in panel D and by paired student t test V0 vs V1 within each cohort (unexposed, immunosuppressed, and exposed) in panel H. Dashed lines represent LOD. D-H, error bars represent SEM.

Fig. S1

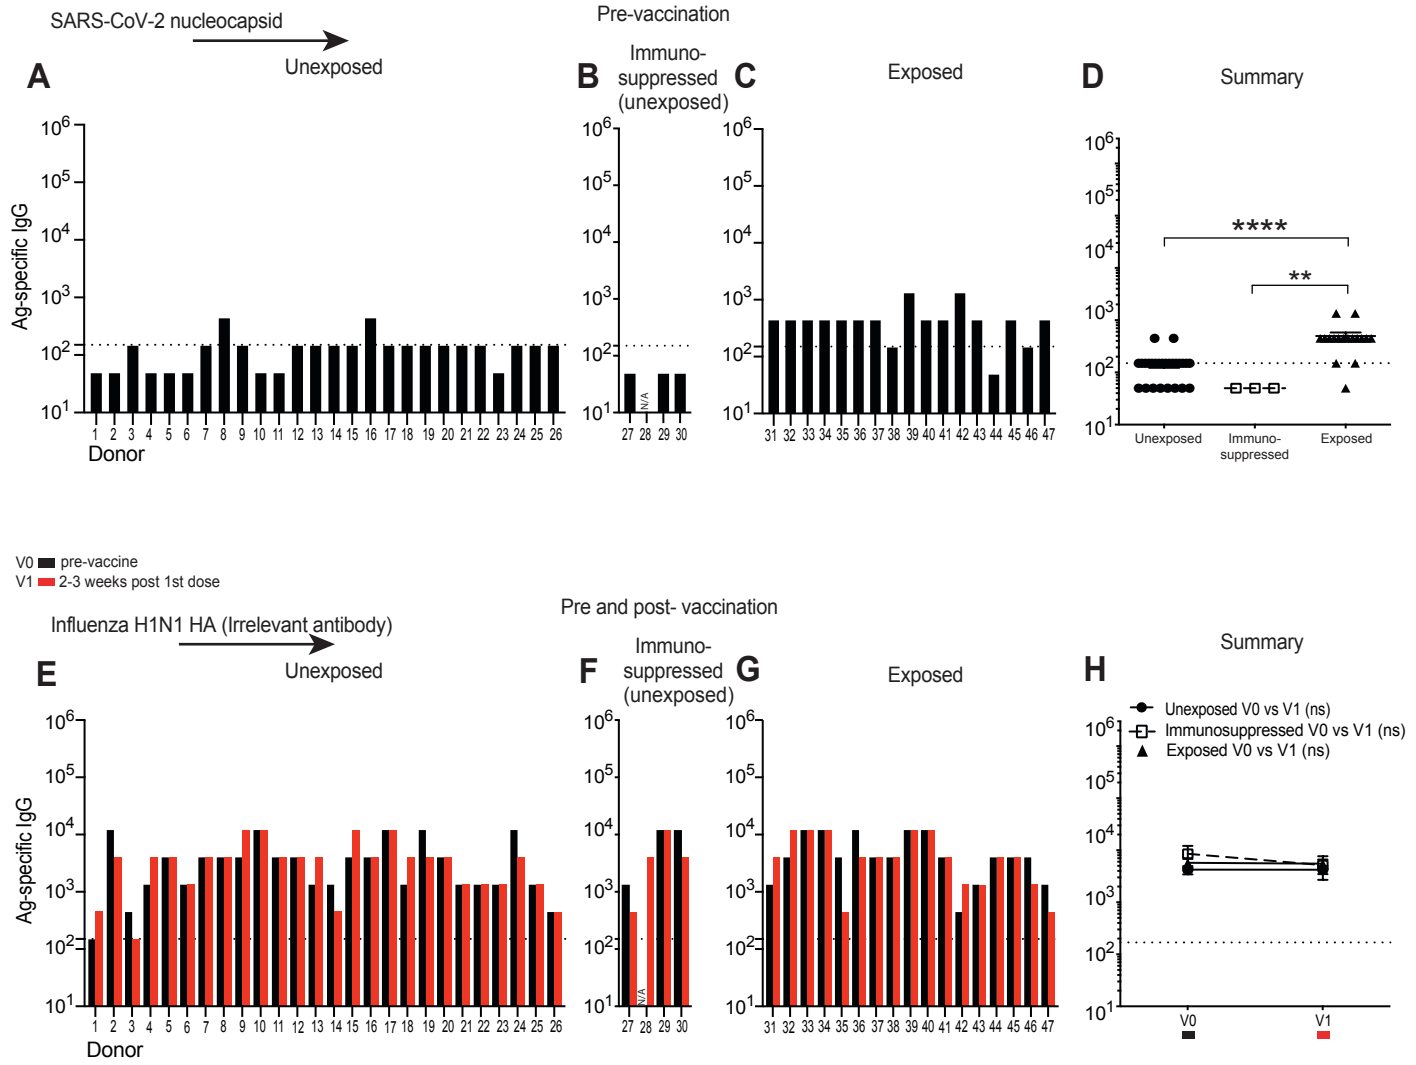

**Supplemental Figure 2. SARS-CoV-1 and SARS-CoV-2 spike specific antibody responses in mice immunized with irrelevant vaccine vectors. (A)**

Antibody responses after immunization with PBS, Ad5-empty or Ad5-SARS-CoV-2 spike. **(B)** Antibody responses after immunization with PBS, VSV-Ova or VSV-SARS-CoV-2 spike. **(C)** Antibody responses after immunization with PBS, MVA-SIV or MVA-SARS-CoV-1 spike. Data are from two independent experiments with n=5/group. Data from all experiments are shown. \*, P <0.05, \*\*\*, P <0.001, and \*\*\*\*, P <0.0001, and ns=not significant by Mann Whitney U Test. Dashed lines represent LOD. Error bars represent SEM.

Fig. S2

**A**

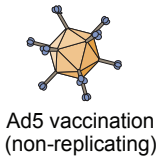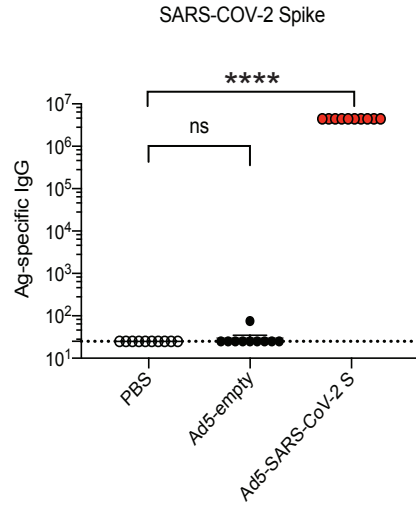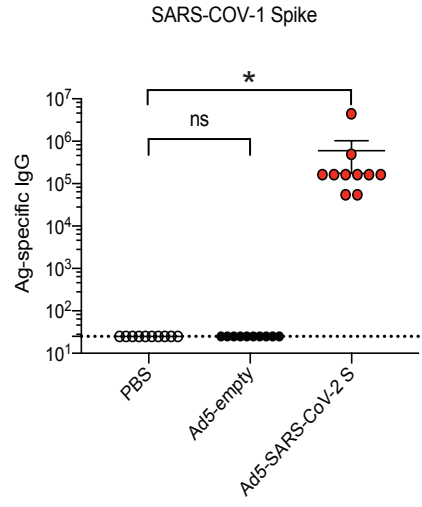

**B**

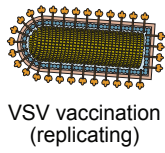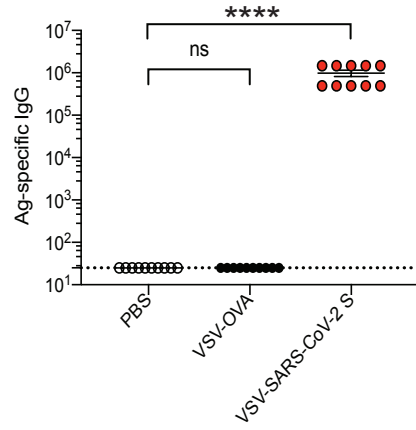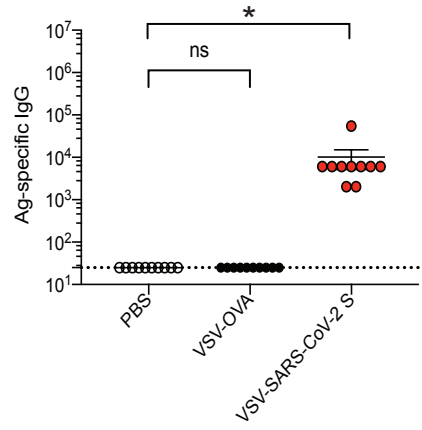

**C**

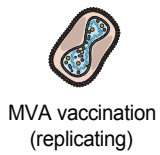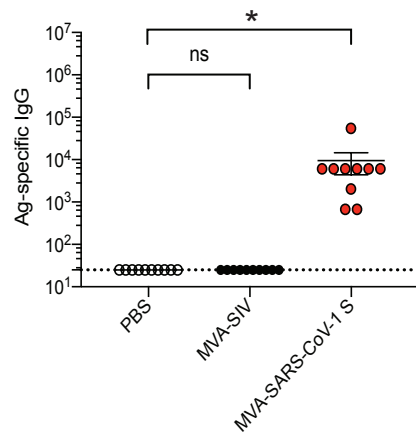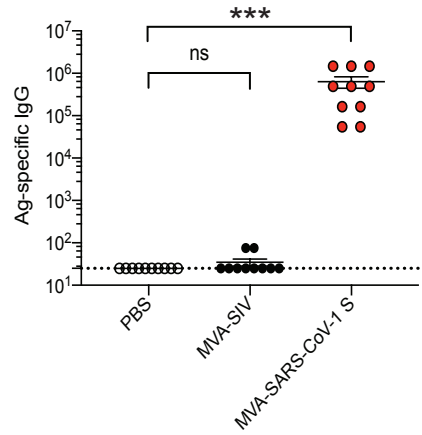

**Supplemental Figure 3. Gene alignment of conserved epitopes across various bat coronaviruses.** (A) Clustal Omega Multiple Sequence Alignment of SARS-CoV-1, SARS-CoV-2, and other betacoronaviruses, showing conservation of the VVLSFELL and VNFNFNGL epitopes. (B) Phylogenetic tree showing the genetic distance between 2 different coronavirus subgenera: sarbecoviruses and embecoviruses.





#### **Supplemental Figure 4. Mapping of conserved CD8 T cell epitopes**

**following SARS-CoV-2 vaccination.** (A) Epitope mapping using Ad5-SARS-CoV-2 spike immune splenocytes (week 2 post-boost), stimulated with overlapping SARS-CoV-2 spike peptide pools for 5 hr at 37°C in a CO<sub>2</sub> incubator. This study identified 2 potential K<sup>b</sup> binding epitopes that are highly conserved among multiple sarbecoviruses listed in Figure S3A: a subdominant VLVSFELL epitope and a dominant VNFNFNGL epitope. Cells are gated on live CD8<sup>+</sup> lymphocytes. (B) K<sup>b</sup> VNFNFNGL (K<sup>b</sup> VL8) tetramer<sup>+</sup> CD8 T cells were FACS-sorted for TCR-sequencing (week 4 post-prime). (C) Top 5 TCR usages (percent of total VL8-specific). (D) TCR sequences in VL8-specific CD8 T cells. (E) TCR Vβ11 frequency in K<sup>b</sup> VL8<sup>+</sup> or K<sup>b</sup> VL8<sup>-</sup> CD8 T cells by confirmatory flow cytometry. Data from panel A represent a pooled sample from 5 spleens. Single-cell TCR-seq data from panels B-D are from 2,032 individual cells from 1 mouse spleen. Experiment was repeated with 2431 individual cells from 1 mouse spleen and similar results were observed (see accession data in Methods). FACS data from panel E are representative from one experiment with n=5 mice (experiment was repeated once with n=5 mice, with similar results).

Fig. S4

**A**

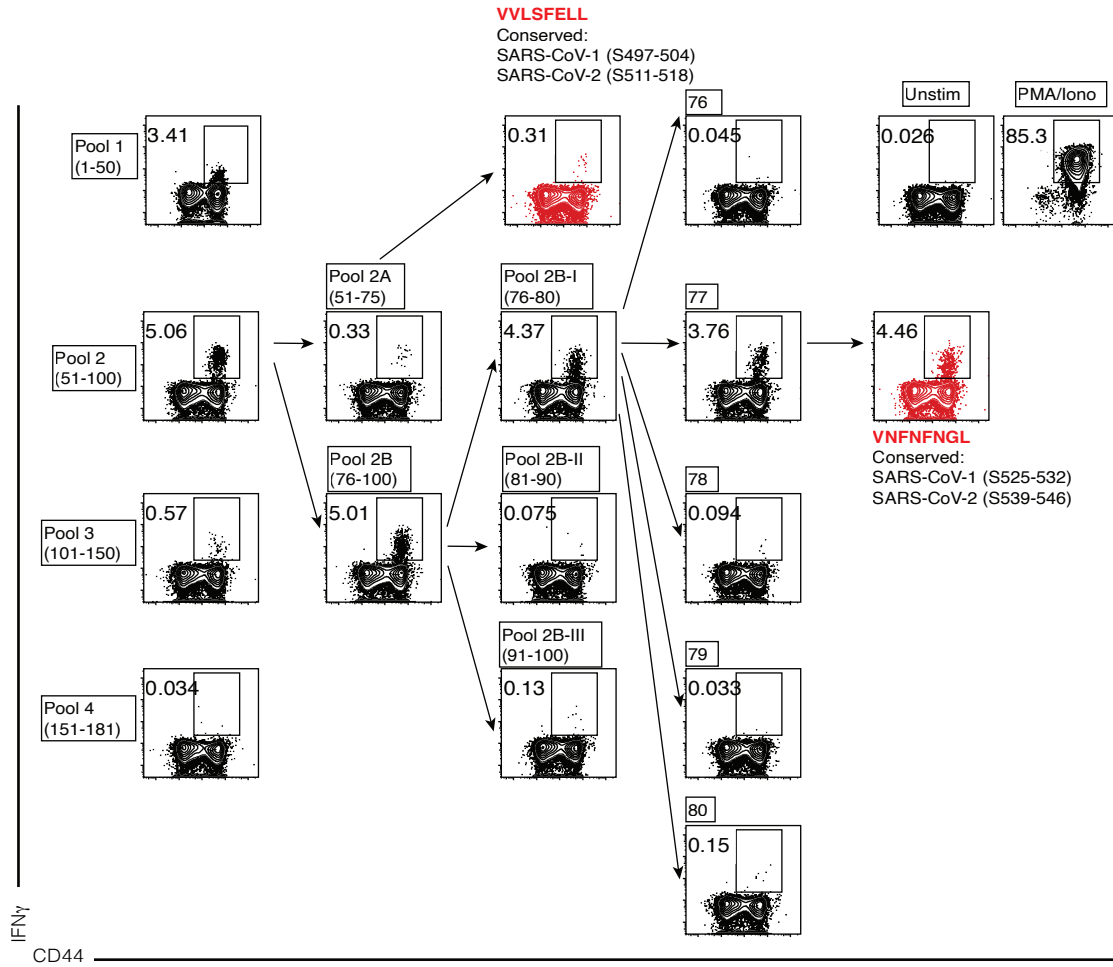

**B**

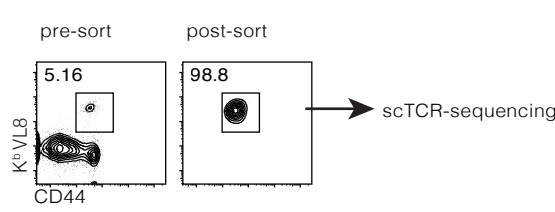

**E**

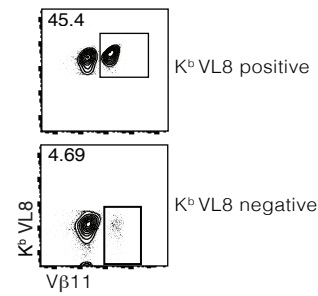

**C**

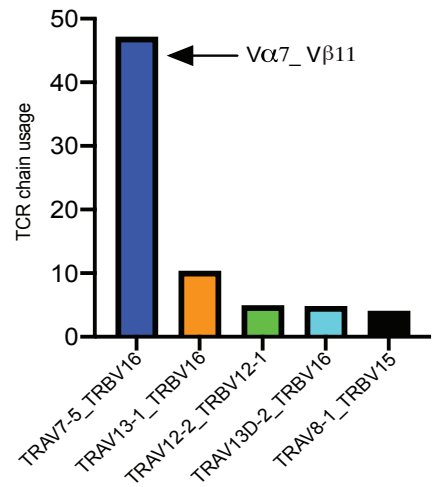

**D**

**TCR $\alpha$  (V7-5, J50)**  
 CTAGAAGGTTGTGCGCGGGATTTTGTATTGGGGAGAATCCCCAGTGGAGAGAGATAAAGAG  
 CAAATGATGAAATCCTTGAGTGTTCACTAGTGGTCTGTGGCTCCAGTTAATGGGTGAGCA  
 GCCAGCAGAAGGTGCGCAGAGCCAGAATCCCTCACTGTCTCAGAGGGAGCCATGGCCTCTCT  
 CAACTGCAGTTCAGTGATGGTACTTCTAACAACCTCAGGTGGTACAGACAGCATTCTGCGAAA  
 GGCCTTGAGGTGCTAGTGTCCATCTCTGATGGTAAAAGGAAGGCAGATTACAGTCTC  
 ACCTCAATAGAGCCAACTTGCATGTTCCCTACACATCAGAGAACCACAACCCAGTGACTTGC  
 TGCTACCTCTGTGCAGTTATAGCATCTCTCTCCTCAGCAAGTGGTGTGGGCGAGGGGACA  
 TCCTTATCAGTCTCCAAACATCCAGAACCCAGAACCTGTGTACCAGTTAAAGATCCTC  
 GGTCTCAGGACAGCACCTCTGCCTGTTCCAGACTTTGACT  
 CDR3 sequence CAVIASSSFSKLVF

**TCR $\beta$  (V16, J2-5, C2)**  
 TCTCGTGCTTACGTGGAGTTTCTATGAGTGAAGCCACTGCCTCATCTTGCCATGGCCCCAGGC  
 TCCTTTTCTGTCTGGTCTTTGCTCTTGAGAGCAGAACCAACAAATGCTGGTGCATCCAAAC  
 ACCTAGGCACAAGGTGACAGGGAAGGACAAGAAGCACTCTGTGGTGTGAGCCAAATTCAGGA  
 CATAGTGTGTTTTCTGTACAGACAGACCATTTGTCAGGGCTGGAGTTCCTGACTTACTTTC  
 GAAATCAAGCTCTATAGATGATTCAGGGATGCCAAGGAACGATTCTCAGCTCAGATGCCAA  
 TCAGTGCACACTCACTGAAATCCAGAGCAGCAACCCAGGACTCAGCGGTATCTTTGT  
 GCAAGCAGCTTACTGGGGGGCGCACACCCAGTACTTTGGGCGAGGCACTCGGCTCCTGTGT  
 TAGAGGACTGTGAGAAATGTGACTCCACCAAGTCTCCTTGTGAGCCATCAAAGCAGAGAT  
 TGCAAACAACAAAAGGCTACCTCTGTGCTTGCC  
 CDR3 sequence CASLLGGRDQYF

5'UTR  
 C region

**Supplemental Figure 5. Cross-reactive antibody responses following coronavirus infections in mice.** (A) Antibody responses after infection with OC43 common cold coronavirus. (B) Antibody responses after infection with MHV-1 coronavirus. Mice were intranasally primed and boosted after 3 weeks (see Methods for virus dose information). Antibody responses were evaluated by ELISA at week 2 post-boost. Experiments were done using wild type C57BL/6 mice. Dashed lines represent LOD. Data are from two independent experiments with n=5/group. Data from all experiments are shown. \*, P <0.05, \*\*\*, P <0.001, and \*\*\*\*, P <0.0001 by Mann Whitney U Test. Error bars represent SEM.



## **Supplemental Table Legends:**

**Supplemental Table 1.** SARS-CoV-2 spike overlapping peptide pools spanning 1273 amino acids. Each individual peptide consisted of 13-17 amino acids, with 10 amino acid overlaps.

| <b>SARS-CoV-2 overlapping peptide pools</b> |                |                           |
|---------------------------------------------|----------------|---------------------------|
| <b>Peptide pools</b>                        | <b>Peptide</b> | <b>Sequence</b>           |
| Pool 1<br>(1-50)                            | <b>1</b>       | 1-MFVFLVLLPLVSSQCVN-17    |
|                                             | <b>2</b>       | 8-LPLVSSQCVNLTRRTQL-24    |
|                                             | <b>3</b>       | 15-CVNLTRRTQLPPAYTNS-31   |
|                                             | <b>4</b>       | 22-TQLPPAYTNSFTRGVYY-38   |
|                                             | <b>5</b>       | 29-TNSFTRGVYYPDKVFRS-45   |
|                                             | <b>6</b>       | 36-VYYPDKVFRSSVLHSTQ-52   |
|                                             | <b>7</b>       | 43-FRSSLHSTQDLFLPFF-59    |
|                                             | <b>8</b>       | 50-STQDLFLPFFSNVTWFH-66   |
|                                             | <b>9</b>       | 57-PFFSNVTWFHAIHVSGT-73   |
|                                             | <b>10</b>      | 64-WFHAIHVSGTNGTKRFD-80   |
|                                             | <b>11</b>      | 71-SGTNGTKRFDNPVLPFN-87   |
|                                             | <b>12</b>      | 78-RFDNPVLPFNDGVYFAS-94   |
|                                             | <b>13</b>      | 85-PFNDGVYFASTEKSNII-101  |
|                                             | <b>14</b>      | 92-FASTEKSNIIRGWIFGT-108  |
|                                             | <b>15</b>      | 99-NIIRGWIFGTTLDSKTQ-115  |
|                                             | <b>16</b>      | 106-FGTTLDSKTQSLIVNN-122  |
|                                             | <b>17</b>      | 113-KTQSLIVNNATNVVIK-129  |
|                                             | <b>18</b>      | 120-VNNATNVVIKVCEFQFC-136 |
|                                             | <b>19</b>      | 127-VIKVCEFQFCNDPFLGV-143 |
|                                             | <b>20</b>      | 134-QFCNDPFLGVYYHKNNK-150 |
|                                             | <b>21</b>      | 141-LGVYYHKNNKSWMESEF-157 |
|                                             | <b>22</b>      | 148-NNKSWMESEFRVYSSAN-164 |
|                                             | <b>23</b>      | 155-SEFRVYSSANNCTFEYV-171 |
|                                             | <b>24</b>      | 162-SANNCTFEYVSQPFLMD-178 |
|                                             | <b>25</b>      | 169-EYVSQPFLMDLEGKQGN-185 |
|                                             | <b>26</b>      | 176-LMDLEGKQGNFKNLREF-192 |
|                                             | <b>27</b>      | 183-QGNFKNLREFVFKNIDG-199 |
|                                             | <b>28</b>      | 190-REFVFKNIDGYFKIYSK-206 |
|                                             | <b>29</b>      | 197-IDGYFKIYSKHTPINLV-213 |
|                                             | <b>30</b>      | 204-YSKHTPINLVRDLPQGF-220 |
|                                             | <b>31</b>      | 211-NLVRDLPQGFSALEPLV-227 |
|                                             | <b>32</b>      | 218-QGFSALEPLVDLPIGIN-234 |
|                                             | <b>33</b>      | 225-PLVDLPIGINITRFQTL-241 |
|                                             | <b>34</b>      | 232-GINITRFQTLALHRSY-248  |
|                                             | <b>35</b>      | 239-QTLLALHRSYTPGDSS-255  |
|                                             | <b>36</b>      | 246-RSYLTPGDSSSGWTAGA-262 |
|                                             | <b>37</b>      | 253-DSSSGWTAGAAAYVGY-269  |
|                                             | <b>38</b>      | 260-AGAAAYVGYLQPRTFL-276  |
|                                             | <b>39</b>      | 267-VGYLQPRTFLLKYNENG-283 |
|                                             | <b>40</b>      | 274-TFLLKYNENGTITDAVD-290 |

|                    |           |                           |
|--------------------|-----------|---------------------------|
|                    | <b>41</b> | 281-ENGTITDAVDCALDPLS-297 |
|                    | <b>42</b> | 288-AVDCALDPLSETKCTLK-304 |
|                    | <b>43</b> | 295-PLSETKCTLKSFTVEKG-311 |
|                    | <b>44</b> | 302-TLKSFTVEKGIYQTSNF-318 |
|                    | <b>45</b> | 309-EKGIYQTSNFRVQPTES-325 |
|                    | <b>46</b> | 316-SNFRVQPTESIVRFPNI-332 |
|                    | <b>47</b> | 323-TESIVRFPNITNLCDFG-339 |
|                    | <b>48</b> | 330-PNITNLCDFGEVFNATR-346 |
|                    | <b>49</b> | 337-PFGEVFNATRFASVYAW-353 |
|                    | <b>50</b> | 344-ATRFASVYAWNRKRISN-360 |
| Pool 2<br>(51-100) | <b>51</b> | 351-YAWNRKRISNCVADYSV-367 |
|                    | <b>52</b> | 358-ISNCVADYSVLYNSASF-374 |
|                    | <b>53</b> | 365-YSVLYNSASFSTFKCYG-381 |
|                    | <b>54</b> | 372-ASFSTFKCYGVSPTKLN-388 |
|                    | <b>55</b> | 379-CYGVSPKLNLDLFTNV-395  |
|                    | <b>56</b> | 386-KLNDLFTNVYADSFVI-402  |
|                    | <b>57</b> | 393-TNVYADSFVIRGDEVRQ-409 |
|                    | <b>58</b> | 400-FVIRGDEVRQIAPGQTG-416 |
|                    | <b>59</b> | 407-VRQIAPGQTGKIADYNY-423 |
|                    | <b>60</b> | 414-QTGKIADYNYKLPDFT-430  |
|                    | <b>61</b> | 421-YNYKLPDFTGCVIAWN-437  |
|                    | <b>62</b> | 428-DFTGCVIAWNSNNLDSK-444 |
|                    | <b>63</b> | 435-AWNSNNLDSKVGGNYY-451  |
|                    | <b>64</b> | 442-DSKVGGNYYLYRLFRK-458  |
|                    | <b>65</b> | 449-YNYLYRLFRKSNLKPFE-465 |
|                    | <b>66</b> | 456-FRKSNLKPFERDISTEI-472 |
|                    | <b>67</b> | 463-PFERDISTEIQAGSTP-479  |
|                    | <b>68</b> | 470-TEIQAGSTPCNGVEGF-486  |
|                    | <b>69</b> | 477-STPCNGVEGFNCYFPLQ-493 |
|                    | <b>70</b> | 484-EGFNCYFPLQSYGFQPT-500 |
|                    | <b>71</b> | 491-PLQSYGFQPTNGVGYQP-507 |
|                    | <b>72</b> | 498-QPTNGVGYQPYRVVLS-514  |
|                    | <b>73</b> | 505-YQPYRVVLSFELLHAP-521  |
|                    | <b>74</b> | 512-VLSFELLHAPATVCGPK-528 |
|                    | <b>75</b> | 519-HAPATVCGPKKSTNLVK-535 |
|                    | <b>76</b> | 526-GPKKSTNLVKNKCVNFN-542 |
|                    | <b>77</b> | 533-LVKNKCVNFNFNGLTGT-549 |
|                    | <b>78</b> | 540-NFNFNGLTGTGVLTESN-556 |
|                    | <b>79</b> | 547-TGTGVLTESNKKFLPFQ-563 |
|                    | <b>80</b> | 554-ESNKKFLPFQQFGRDIA-570 |
|                    | <b>81</b> | 561-PFQQFGRDIADTTDAVR-577 |
|                    | <b>82</b> | 568-DIADTTDAVRDPQTLEI-584 |
|                    | <b>83</b> | 575-AVRDPQTLEILDITPCS-591 |

|                     |            |                                  |
|---------------------|------------|----------------------------------|
|                     | <b>84</b>  | <b>582-LEILDITPCSFGGVSVI-598</b> |
|                     | <b>85</b>  | <b>589-PCSFGGVSVITPGTNTS-605</b> |
|                     | <b>86</b>  | <b>596-SVITPGTNTSNQVAVLY-612</b> |
|                     | <b>87</b>  | <b>603-NTSNQVAVLYQDVNCTE-619</b> |
|                     | <b>88</b>  | <b>610-VLYQDVNCTEVPVAIHA-626</b> |
|                     | <b>89</b>  | <b>617-CTEVPVAIHADQLTPTW-633</b> |
|                     | <b>90</b>  | <b>624-IHADQLTPTWRVYSTGS-640</b> |
|                     | <b>91</b>  | <b>631-PTWRVYSTGSNVFQTRA-647</b> |
|                     | <b>92</b>  | <b>638-TGSNVFQTRAGCLIGAE-654</b> |
|                     | <b>93</b>  | <b>645-TRAGCLIGAEHVNNSYE-661</b> |
|                     | <b>94</b>  | <b>652-GAEHVNNSYECDIPIGA-668</b> |
|                     | <b>95</b>  | <b>659-SYECDIPIGAGICASYQ-675</b> |
|                     | <b>96</b>  | <b>666-IGAGICASYQTQTNSPR-682</b> |
|                     | <b>97</b>  | <b>673-SYQTQTNSPRRARSVAS-689</b> |
|                     | <b>98</b>  | <b>680-SPRRARSVASQSIIAYT-696</b> |
|                     | <b>99</b>  | <b>687-VASQSIIAYTMSLGAEN-703</b> |
|                     | <b>100</b> | <b>694-AYTMSLGAENSVAYSNN-710</b> |
| Pool 3<br>(101-150) | <b>101</b> | <b>701-AENSVAYSNNIAIPTN-717</b>  |
|                     | <b>102</b> | <b>708-SNNSIAIPTNFTISVTT-724</b> |
|                     | <b>103</b> | <b>715-PTNFTISVTTEILPVSM-731</b> |
|                     | <b>104</b> | <b>722-VTTEILPVSMTKTSVDC-738</b> |
|                     | <b>105</b> | <b>729-VSMTKTSVDCTMYICGD-745</b> |
|                     | <b>106</b> | <b>736-VDCTMYICGDSTECNL-752</b>  |
|                     | <b>107</b> | <b>743-CGDSTECNLLLQYGSF-759</b>  |
|                     | <b>108</b> | <b>750-SNLLLQYGSFCTQLNRA-766</b> |
|                     | <b>109</b> | <b>757-GSFCTQLNRALTGIAVE-773</b> |
|                     | <b>110</b> | <b>764-NRALTGIAVEQDKNTQE-780</b> |
|                     | <b>111</b> | <b>771-AVEQDKNTQEVFAQVKQ-787</b> |
|                     | <b>112</b> | <b>778-TQEVFAQVKQIYKTPPI-794</b> |
|                     | <b>113</b> | <b>785-VKQIYKTPPIKDFGGFN-801</b> |
|                     | <b>114</b> | <b>792-PPIKDFGGFNFSQILPD-808</b> |
|                     | <b>115</b> | <b>799-GFNFSQILPDPSKPSKR-815</b> |
|                     | <b>116</b> | <b>806-LPDPSKPSKRSFIEDLL-822</b> |
|                     | <b>117</b> | <b>813-SKRSFIEDLLFNKVTLA-829</b> |
|                     | <b>118</b> | <b>820-DLLFNKVTLADAGFIKQ-836</b> |
|                     | <b>119</b> | <b>827-TLADAGFIKQYGDCLGD-843</b> |
|                     | <b>120</b> | <b>834-IKQYGDCLGDIAARDLI-850</b> |
|                     | <b>121</b> | <b>841-LGDIAARDLICAQKFNG-857</b> |
|                     | <b>122</b> | <b>848-DLICAQKFNGLTVLPPL-864</b> |
|                     | <b>123</b> | <b>855-FNGLTVLPPLLTDEMIA-871</b> |
|                     | <b>124</b> | <b>862-PPLLTDEMIAQYTSALL-878</b> |
|                     | <b>125</b> | <b>869-MIAQYTSALLAGTITSG-885</b> |
|                     | <b>126</b> | <b>876-ALLAGTITSGWTFGAGA-892</b> |



|                     |            |                             |
|---------------------|------------|-----------------------------|
|                     | <b>127</b> | 883-TSGWTFGAGAALQIPFA-899   |
|                     | <b>128</b> | 890-AGAALQIPFAMQMAYRF-906   |
|                     | <b>129</b> | 897-PFAMQMAYRFNGIGVTQ-913   |
|                     | <b>130</b> | 904-YRFNGIGVTQNVLYENQ-920   |
|                     | <b>131</b> | 911-VTQNVLYENQKLIANQF-927   |
|                     | <b>132</b> | 918-ENQKLIANQFNSAIGKI-934   |
|                     | <b>133</b> | 925-NQFNSAIGKIQDLSLST-941   |
|                     | <b>134</b> | 932-GKIQDLSLSTASALGKL-948   |
|                     | <b>135</b> | 939-SSTASALGKLQDVVNQN-955   |
|                     | <b>136</b> | 946-GKLQDVVNQNAQALNTL-962   |
|                     | <b>137</b> | 953-NQNAQALNTLVKQLSSN-969   |
|                     | <b>138</b> | 960-NTLVKQLSSNFGAISSV-976   |
|                     | <b>139</b> | 967-SSNFGAISSVLNDILSR-983   |
|                     | <b>140</b> | 974-SSVLNDILSRDKVEAE-990    |
|                     | <b>141</b> | 981-LSRLDKVEAEVQIDRLI-997   |
|                     | <b>142</b> | 988-EAEVQIDRLITGRLQSL-1004  |
|                     | <b>143</b> | 995-RLITGRLQSLQTYVTQQ-1011  |
|                     | <b>144</b> | 1002-QSLQTYVTQQLIRAAEI-1018 |
|                     | <b>145</b> | 1009-TQQLIRAAEIRASANLA-1025 |
|                     | <b>146</b> | 1016-AEIRASANLAATKMSEC-1032 |
|                     | <b>147</b> | 1023-NLAATKMSECVLGQSKR-1039 |
|                     | <b>148</b> | 1030-SECVLGQSKRVDFCGKG-1046 |
|                     | <b>149</b> | 1037-SKRVDFCGKGYHLMSFP-1053 |
|                     | <b>150</b> | 1044-GKGYHLMSFPQSAPHGV-1060 |
| Pool 4<br>(151-181) | <b>151</b> | 1051-SFPQSAPHGVVFLHVTY-1067 |
|                     | <b>152</b> | 1058-HGVVFLHVTYVPAQEKN-1074 |
|                     | <b>153</b> | 1065-VTYVPAQEKNFTTAPAI-1081 |
|                     | <b>154</b> | 1072-EKNFTTAPAICHDGKAH-1088 |
|                     | <b>155</b> | 1079-PAICHDGKAHFPREGVF-1095 |
|                     | <b>156</b> | 1086-KAHFPREGVFSNGTHW-1102  |
|                     | <b>157</b> | 1093-GVFSNGTHWFVTQRNF-1109  |
|                     | <b>158</b> | 1100-THWFVTQRNFYEPQIIT-1116 |
|                     | <b>159</b> | 1107-RNFYEPQIITDNTFVS-1123  |
|                     | <b>160</b> | 1114-IITDNTFVSGNCDVVI-1130  |
|                     | <b>161</b> | 1121-FVSGNCDVVIGIVNNTV-1137 |
|                     | <b>162</b> | 1128-VVIGIVNNTVYDPLQPE-1144 |
|                     | <b>163</b> | 1135-NTVYDPLQPELDSFKEE-1151 |
|                     | <b>164</b> | 1142-QPELDSFKEELDKYFKN-1158 |
|                     | <b>165</b> | 1149-KEELDKYFKNHTSPDVD-1165 |
|                     | <b>166</b> | 1156-FKNHTSPDVDLGDISGI-1172 |
|                     | <b>167</b> | 1163-DVDLGDISGINASVVNI-1179 |
|                     | <b>168</b> | 1170-SGINASVVNIQKEIDRL-1186 |
|                     | <b>169</b> | 1177-VNIQKEIDRLNEVAKNL-1193 |

|            |                             |
|------------|-----------------------------|
| <b>170</b> | 1184-DRLNEVAKNLNESLIDL-1200 |
| <b>171</b> | 1191-KNLNESLIDLQELGKYE-1207 |
| <b>172</b> | 1198-IDLQELGKYEQYIKWPW-1214 |
| <b>173</b> | 1205-KYEQYIKWPWYIWLGF-1221  |
| <b>174</b> | 1212-WPWYIWLGFIAGLIAIV-1228 |
| <b>175</b> | 1219-GFIAGLIAIVMTIMLC-1235  |
| <b>176</b> | 1226-AIVMTIMLCCMTSCCS-1242  |
| <b>177</b> | 1233-MLCCMTSCCSCLKGCCS-1249 |
| <b>178</b> | 1240-CCSCLKGCCSCGSCCKF-1256 |
| <b>179</b> | 1247-CCSCGSCCKFDEDDSEP-1263 |
| <b>180</b> | 1254-CKFDEDDSEPVKGVKL-1270  |
| <b>181</b> | 1261-SEPVKGVKLHYT-1273      |
